# Supplementary material for: Pharmacologic Reduction of Mitochondrial Iron Triggers a Noncanonical BAX/BAK-Dependent Cell Death
Source: PubMed Central journal article supplement — Cancer Discov. 2022 Mar 8;12(3):774–91. doi: 10.1158/2159-8290.CD-21-0522 (PMC9390741; doi:10.1158/2159-8290.cd-21-0522), 2022-03-08
Supplement: cd-21-0522_supplementary_figure_1_suppsf1.pdf [file cd-21-0522_supplementary_figure_1_suppsf1.pdf]

Figure S1

A

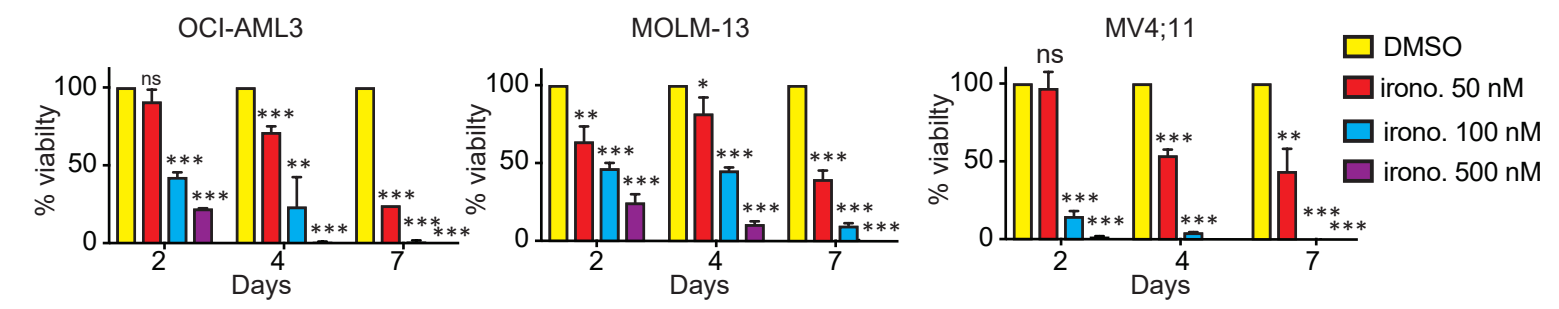

B

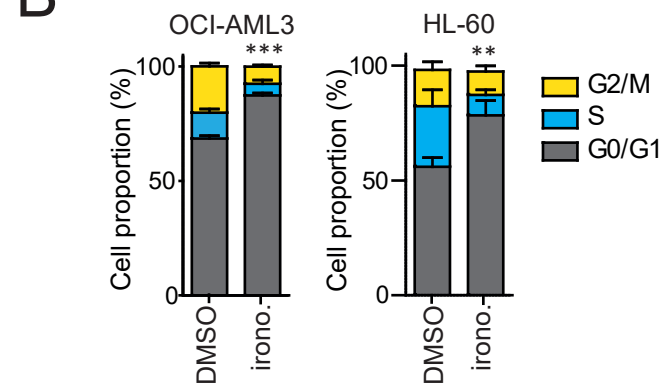

C

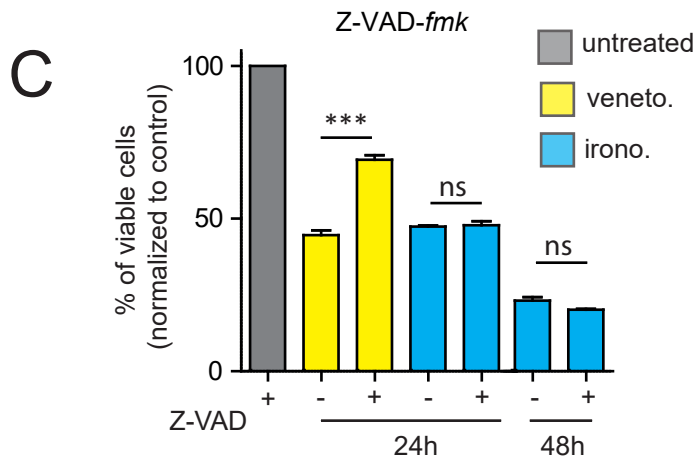

D

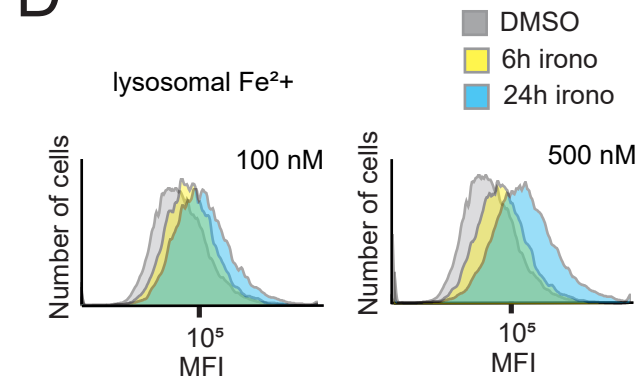

E

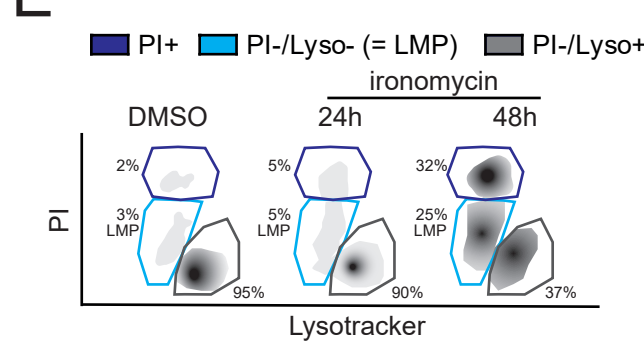

F

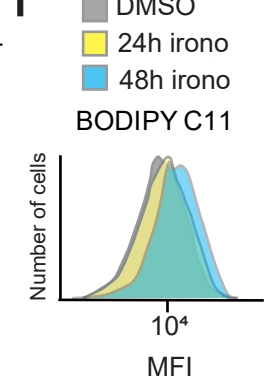

G

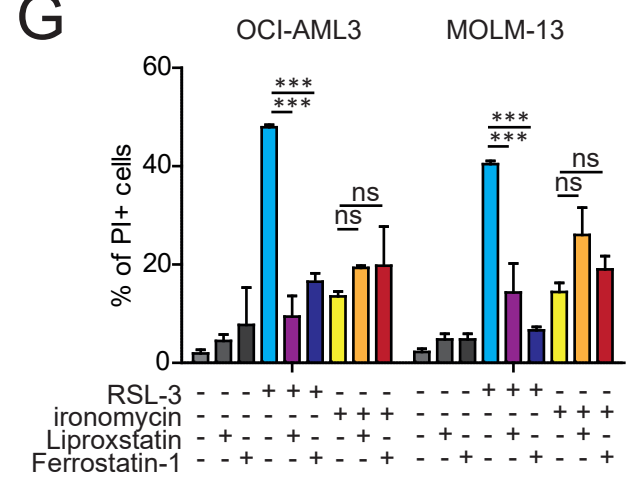

H

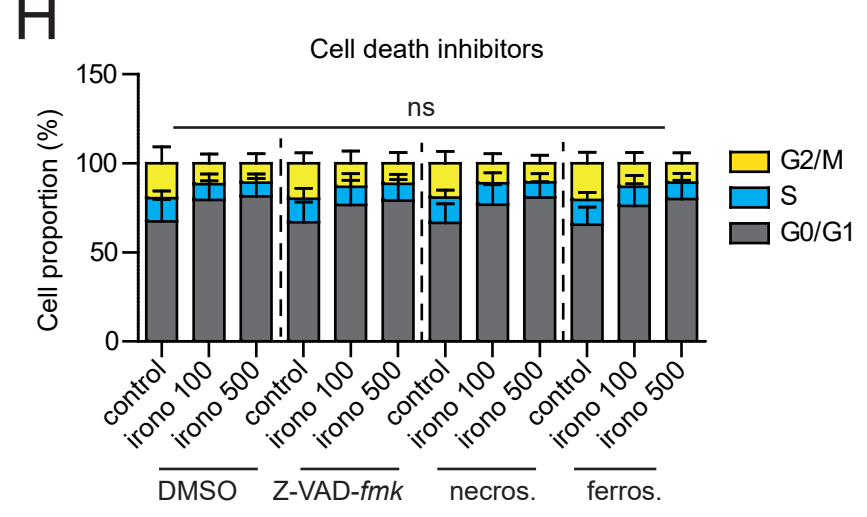

**Figure S1| (related to Figure 1). Ironomycin induces potent cell death in acute myeloid leukaemia through a non-classical cell death pathway. A,** Cell viability assessed by FACS (PI) in OCI-AML3, MOLM-13 and MV4;11 cell lines treated with ironomycin (n=3 biological replicates, means  $\pm$  SD; \*p < 0.05, \*\*p < 0.01, \*\*\*p < 0.001). **B,** Cell cycle analysis using DAPI on OCI-AML3 and HL60 cell lines after 24 hours of DMSO or 500 nM (n=3 biological replicates, means  $\pm$  SD; \*\*p < 0.01, \*\*\*p < 0.001). **C,** Effect on cell death of the pan-caspase inhibitor Z-VAD-*fmk*. MV4;11 cells were pretreated with 50  $\mu$ M Z-VAD-*fmk* for 30 minutes and treated with 500 nM ironomycin or 50 nM venetoclax. Cell death was assessed by FACS (PI, n=3 biological replicates, means  $\pm$  SD, \*\*\* indicates p<.0005). **D,** FACS plots showing lysosomal Fe<sup>2+</sup> using a lysosomal FACS turn-on probe (60) upon ironomycin treatment in MOLM-13 cells. Fe<sup>2+</sup> specifically reduces Rhonox-M to a Rhodamine B derivative, which fluoresces. One representative experiment is shown. **E,** FACS plot showing lysosomal membrane permeabilization (LMP) using lysotracker (Lyso) in MOLM-13 cell line. We treated cells with DMSO or 500 nM ironomycin. LMP is associated with a loss of lysotracker staining. We show one single representative experiment **F,** FACS plots showing lipid peroxidation using BODIPY C11 staining at 24 and 48 hours of 500 nM ironomycin treatment and DMSO control (48 h) in MOLM-13 cells. One representative experiment is shown. **G,** Effect on cell viability of the ferroptosis inhibitors ferrostatin-1 or liproxstatin. MOLM-13 cell line was pretreated with 20  $\mu$ M ferrostatin-1 or 10  $\mu$ M liproxstatin for 30 minutes and treated with 500 nM ironomycin or 30 nM RSL-3 for the indicated times. Cell death (PI positive cells) was assessed by FACS staining (n=3 biological replicates, means  $\pm$  SD, \*\*\*p < 0.001). **H,** Cell cycle analysis using DAPI staining by FACS in AML cell lines without treatment or after 24 hours of 500 nM ironomycin. Cells were pretreated with 50  $\mu$ M Z-VAD-*fmk*, 10  $\mu$ M necrostatin-1 or 20  $\mu$ M ferrostatin-1 for 30 minutes before ironomycin treatment (n=3 biological replicates in OCI-AML3, HL-60 and MOLM-13 cell lines).
