# Supplementary material for: Pharmacologic Reduction of Mitochondrial Iron Triggers a Noncanonical BAX/BAK-Dependent Cell Death
Source: PubMed Central journal article supplement — Cancer Discov. 2022 Mar 8;12(3):774–91. doi: 10.1158/2159-8290.CD-21-0522 (PMC9390741; doi:10.1158/2159-8290.cd-21-0522), 2022-03-08
Supplement: cd-21-0522_supplementary_figure_5_suppsf5.pdf [file cd-21-0522_supplementary_figure_5_suppsf5.pdf]

# Figure S5

## A

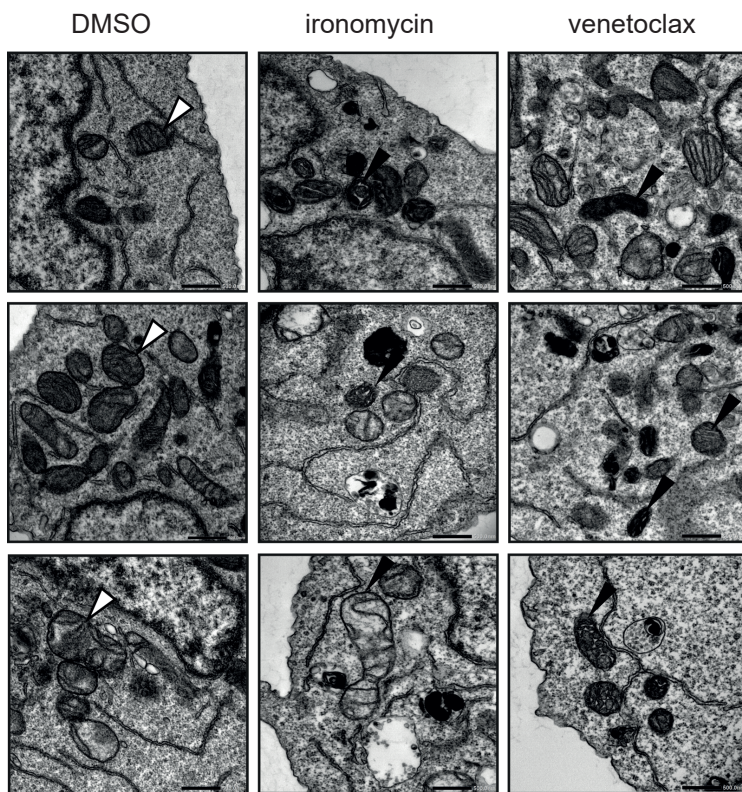

## B

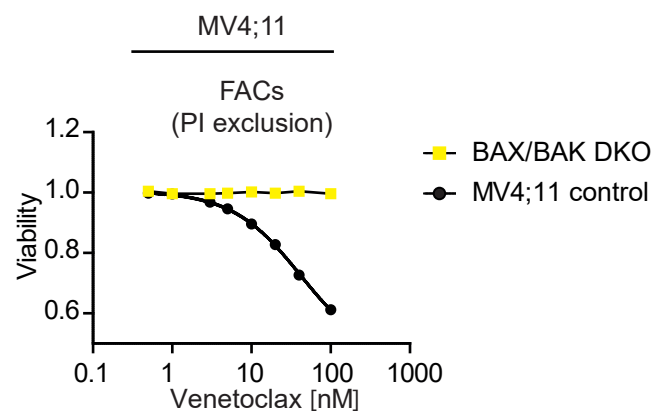

## C

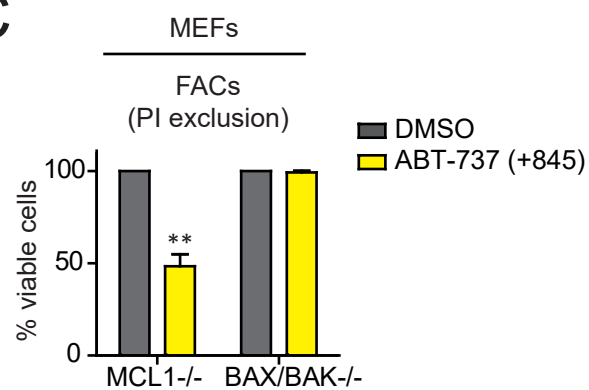

## D

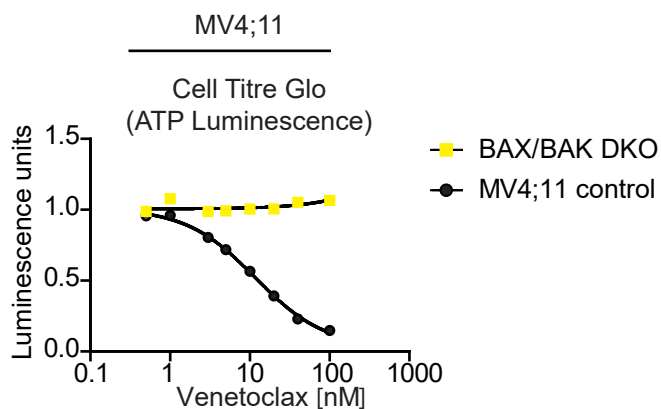

## G

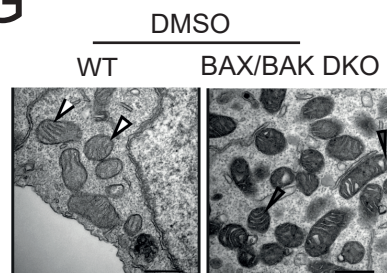

## H

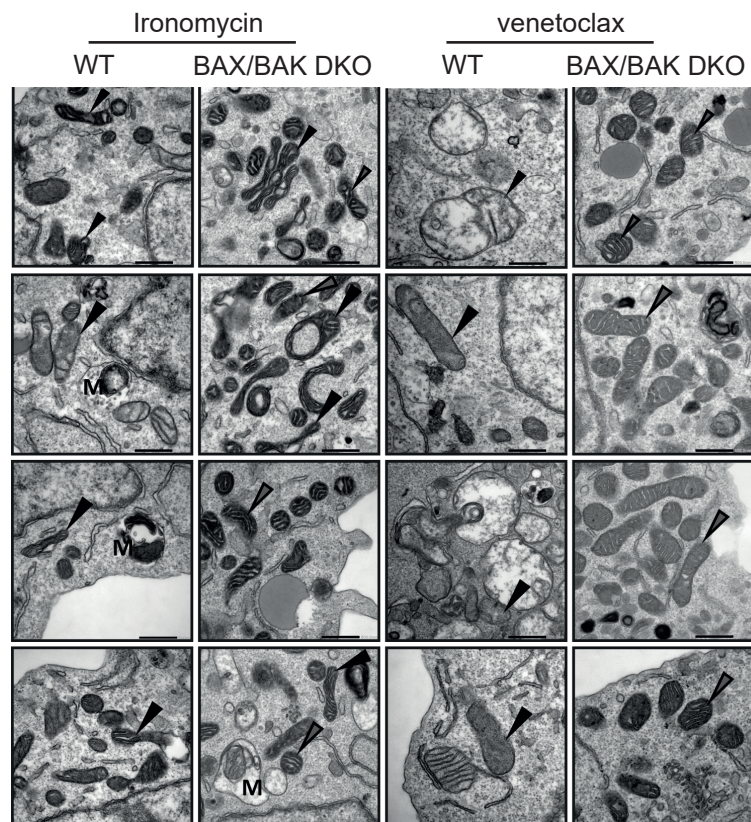

## E

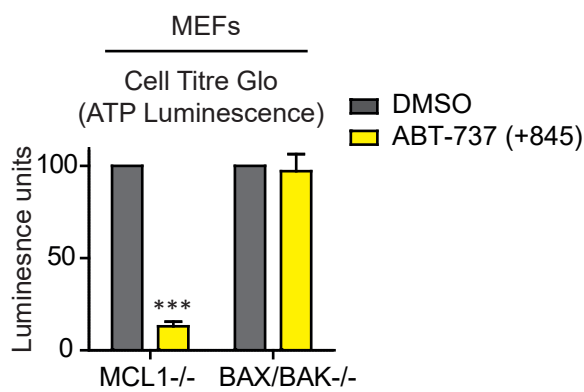

## F

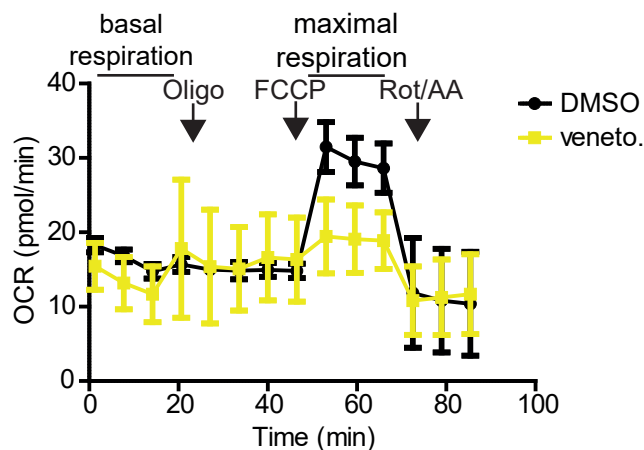

**Figure S5| (related to Figure 5). Ironomycin induced mitochondrial dysfunction is BAX/BAK independent but cell death is BAX/BAK dependent. A,** Transmission electron microscopy images of MV4;11 cells treated with or without 500 nM ironomycin or 50 nM venetoclax for 36 hours. White arrowheads – standard mitochondrial morphology; black arrowheads – changed mitochondrial morphology (cristae reduction and dilation, fragmentation, or dark condensed matrix). Scale bars, 20  $\mu$ m top panel, 500 nm bottom panel. **B,** Cell death assessed by PI exclusion using FACS in MV4,11 WT and BAX/BAK DKO cell lines after 48 hours of venetoclax (n=3 biological replicates). **C,** Cell death assessed by PI exclusion using FACS in MEF cells treated for 48 hours with 1  $\mu$ M ABT-737 + 20  $\mu$ M S63845 (MCL-1 inhibitor, only for *Bax*<sup>-/-</sup> *Bak*<sup>-/-</sup> MEF cell line). We compared a *Bax*<sup>-/-</sup> *Bak*<sup>-/-</sup> with a control *Mcl-1*<sup>-/-</sup> MEF cell line (n=3 biological replicates, means  $\pm$  SEM, \*p < 0.05). **D,** ATP luminescence measured by Cell Titer-Glo® in MV4,11 WT and BAX/BAK DKO cell lines after 48 hours of venetoclax (n=3 biological replicates). **E,** ATP luminescence measured by Cell Titer-Glo® in MEF cells treated for 48 hours with with 1  $\mu$ M ABT-737 + 20  $\mu$ M S63845 (MCL-1 inhibitor, only for *Bax*<sup>-/-</sup> *Bak*<sup>-/-</sup> MEF cell line). We compared a *Bax*<sup>-/-</sup> *Bak*<sup>-/-</sup> with a control *Mcl-1*<sup>-/-</sup> MEF cell line, (n=3 biological replicates, means  $\pm$  SEM, \*\*\*p < 0.001). **F,** Seahorse assay measuring mitochondrial basal and maximal respiration in WT MV4;11 cells. We treated the cells for 6 hours with 50 nM venetoclax (n=3 biological replicates). **G-H,** Transmission electron microscopy images of mitochondria in MV4;11 WT and BAX/BAK DKO cells treated with DMSO (**G**), 500 nM ironomycin or 50nM venetoclax for 16 hours (**H**). M – Mitophagosome; White arrowheads – standard mitochondrial morphology; grey arrowheads –changed morphology of Bax/Bak DKO cells (dark matrix with dilated cristae); black arrowheads – changed mitochondrial morphology (cristae reduction and dilation, condensed matrix, unusual shapes, circular mitochondria, or electron-lucent areas). Scale bars, 500 nm.
