# Supplementary material for: Pharmacologic Reduction of Mitochondrial Iron Triggers a Noncanonical BAX/BAK-Dependent Cell Death
Source: PubMed Central journal article supplement — Cancer Discov. 2022 Mar 8;12(3):774–91. doi: 10.1158/2159-8290.CD-21-0522 (PMC9390741; doi:10.1158/2159-8290.cd-21-0522), 2022-03-08
Supplement: cd-21-0522_supplementary_figure_7_suppsf7.pdf [file cd-21-0522_supplementary_figure_7_suppsf7.pdf]

# Figure S7

## A

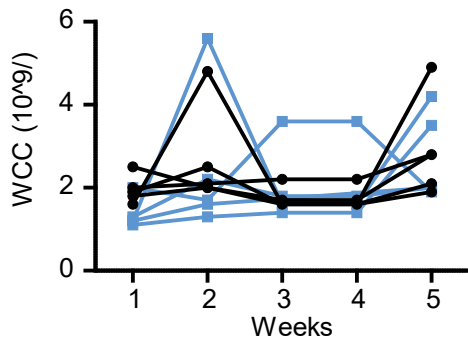

## B

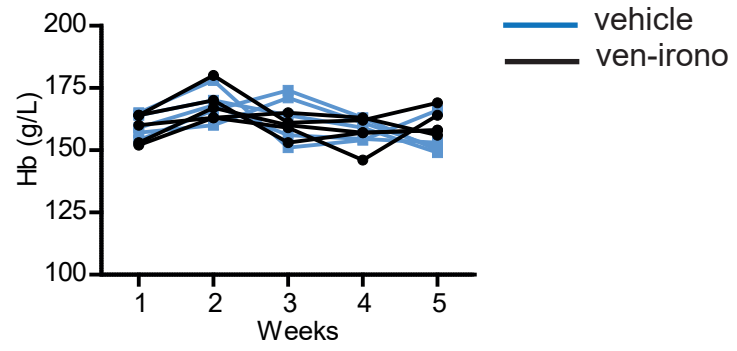

## C

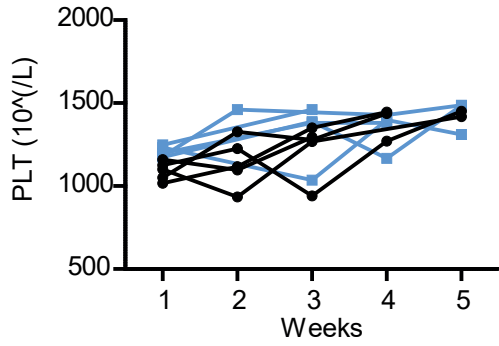

## D

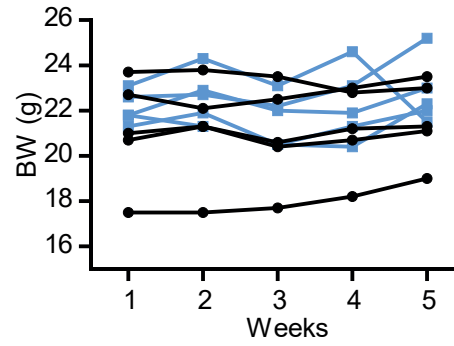

## E

| AML ID      | Sex | Age | AML type                     | Disease status     | Mutational profile                                                  | Karyotype            | Response to venetoclax therapy          |
|-------------|-----|-----|------------------------------|--------------------|---------------------------------------------------------------------|----------------------|-----------------------------------------|
| 01-004-2019 | F   | 78  | AML with MDS related changes | Primary refractory | NRAS G13R<br>SRSF2 P95L                                             | Normal               | Refractory on venetoclax clinical trial |
| 03-331-2018 | M   | 22  | AML with MDS related changes | Relapsed           | No mutations on a targeted panel                                    | Complex with t(6;11) | Relapsed on venetoclax + azacitidine    |
| 02-165-2019 | F   | 80  | AML with MDS related changes | De novo            | SRSF2 P95L                                                          | Complex              | Resistant to venetoclax ex vivo         |
| 01-279-2015 | F   | 70  | AML without maturation       | Relapsed           | FLT3-ITD<br>NPM1 W288fs<br>TET2 Q150*<br>DNMT3A R882H<br>FLT3 D835Y | Normal               | Relapsed on venetoclax + decitabine     |
| 01-047-2015 | M   | 66  | AML with minimal maturation  | De novo            | FLT3-ITD<br>IDH1 R132C<br>RUNX1 A142D<br>SRSF2 P95H                 | Normal               | Refractory to venetoclax + LDAC         |

**Figure S7| (related to Figure 7). Combination of ironomycin and venetoclax tolerance in NSG mice. A-D,** Tolerance of the venetoclax plus ironomycin combination (ven-irono) in NSG mice. Curves show white cell counts [WCC, (A)]; Hb level [Hb, (B)]; platelet count [PLT, (C)] and body weight [BW, (D)] in 5 treated with ven-irono and 5 control mice treated with vehicle. Doses of treatment were ironomycin 1 mg/kg by IP (5 days/week for 4 weeks) and venetoclax 75 mg/kg by oral gavage (5 days/week for 4 weeks). **E,** Characteristics of clinical samples used for synergy experiment in Figure 7F.
